# Supplementary material
Source: PubMed Central journal article supplement (PMC6590071)
Supplement: NIHMS1026079-supplement-Supplemental.pdf [file NIHMS1026079-supplement-Supplemental.pdf]

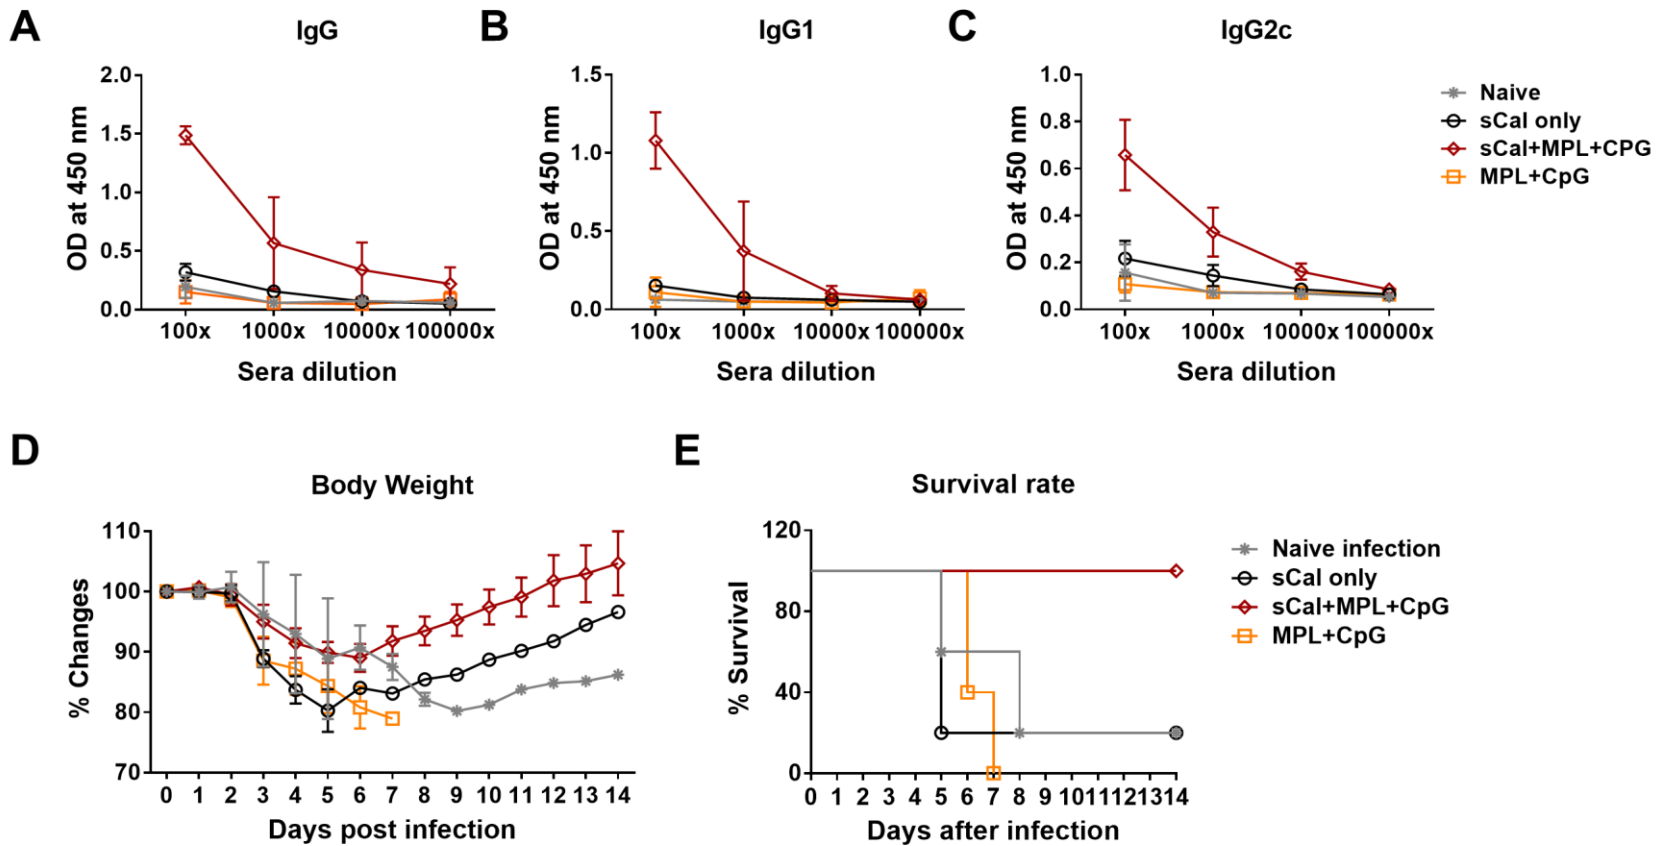

**Supplementary Fig. 1. Rg-H5N1 specific antibody levels and protection after rgH5N1 infection in the immunized C57BL/6 mice.** C57BL/6 mice (n=5-6) were intramuscularly immunized two times with 3  $\mu$ g of split virus vaccine (sCal, A/California/2009 H1N1 virus) alone, sCal plus MPL 0.5  $\mu$ g + CpG 2  $\mu$ g, or MPL 0.5  $\mu$ g + CpG 2  $\mu$ g only. **(A-C)** After boost immunization, the immune sera were taken to measure rgH5N1 specific antibody levels. **(D-E)** The immunized mice were infected with rgH5N1 (1.5xLD<sub>50</sub>), and body weight changes and survival rates were monitored for 14 days. All data were shown in mean  $\pm$  standard deviation (SD).

## A. Prime

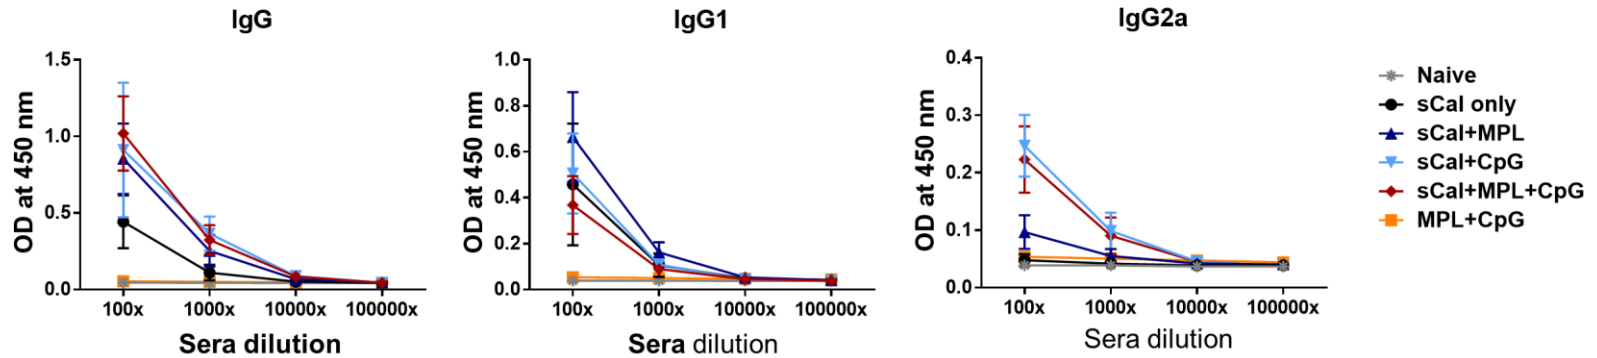

## B. Boost

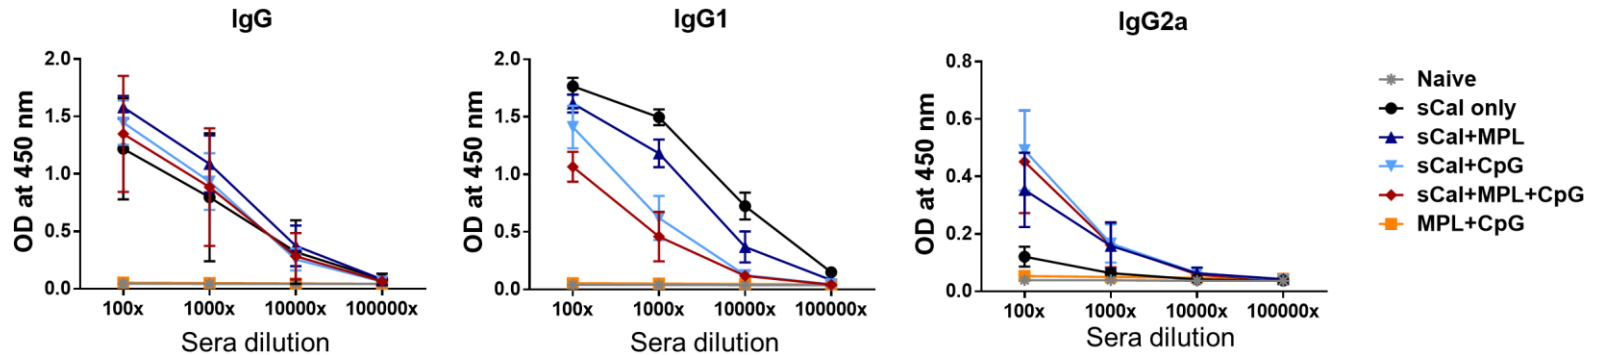

**Supplementary Fig. 2. Levels of serum IgG and IgG isotype antibodies recognizing the vaccine strain in BALB/c mice after vaccination.** BALB/c mice (n=5) were intramuscularly immunized with 0.3  $\mu$ g of split virus vaccine (sCal, A/California/2009 H1N1 virus) alone or in the presence of adjuvants two times at a 3-week interval. The doses of adjuvants were as follows: MPL 0.5  $\mu$ g, CpG 2  $\mu$ g, or MPL 0.5  $\mu$ g + CpG 2  $\mu$ g. The immune sera were taken 2 weeks after each immunization (prime and boost) and A/Cal H1N1 virus-specific antibody levels were measured by ELISA. All data were shown in mean  $\pm$  standard deviation (SD).

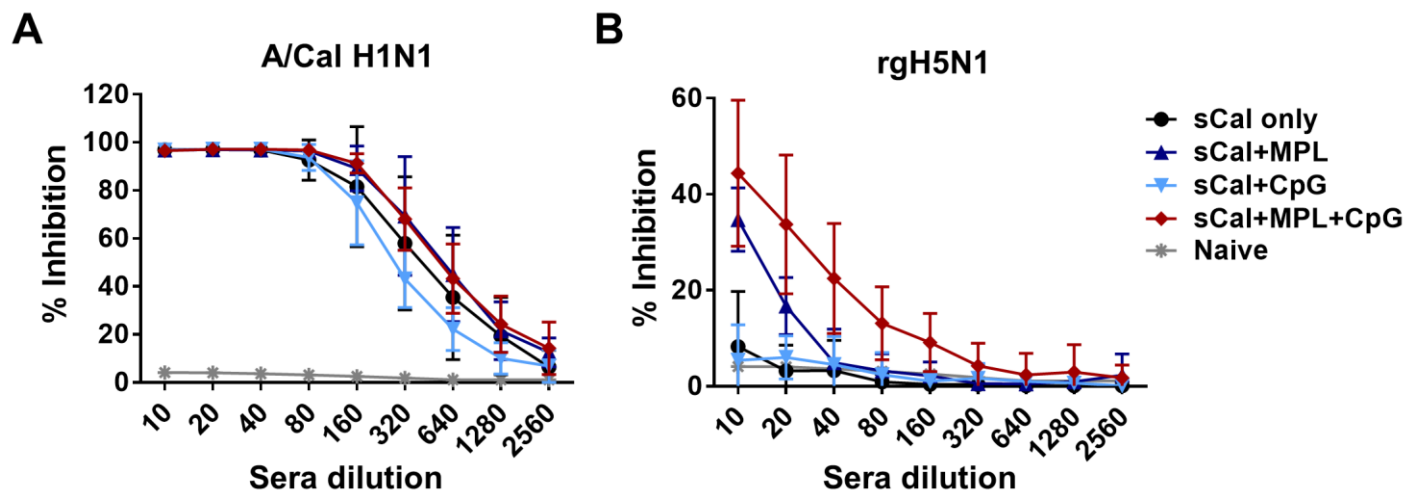

**Supplementary Fig. 3. Neuraminidase inhibition (NAI) assay with the immune sera of Balb/c mice.** (A) NAI titers against homologous A/Cal H1N1 virus. (B) NAI titers against heterosubtypic rgH5N1 virus. Percentages of inhibitions were based on the virus only treated wells. All data were shown in mean  $\pm$  standard deviation (SD).

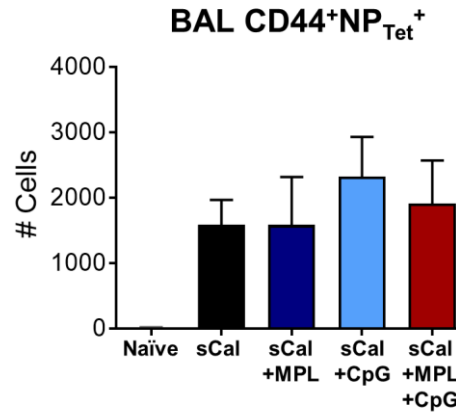

**Supplementary Fig. 4. Influenza nucleoprotein (NP)-specific CD8 memory T cells in the immunized Balb/c mice after rgH5N1 infection.** Bronchoalveolar lavage (BAL) was collected at day 7 post infection and BAL cells were stained with NP-tetramer to determine antigen-specific T cell responses. CD3<sup>+</sup>CD8<sup>+</sup>CD44<sup>+</sup>NP<sub>tet</sub><sup>+</sup> cells were shown. All data were shown in mean ± standard deviation (SD).
